# Supplementary material
Source: ML conference proceedings conference paper supplement (https://openreview.net/forum?id=hcVlMF3Nvxg)
Supplement: supplementary_material [file attachment]

## A Proof of Theorem 1

We first define some notations that will be used in our proof. Given an input  $\mathbf{x}$ , we define the following two random variables:

$$\mathbf{X} = \mathbf{x} + \epsilon \sim \mathcal{N}(\mathbf{x}, \sigma^2 I), \quad (11)$$

$$\mathbf{Y} = \mathbf{x} + \delta + \epsilon \sim \mathcal{N}(\mathbf{x} + \delta, \sigma^2 I), \quad (12)$$

where  $\epsilon \sim \mathcal{N}(0, \sigma^2 I)$  and  $\delta$  is an adversarial perturbation that has the same size with  $\mathbf{x}$ . The random variables  $\mathbf{X}$  and  $\mathbf{Y}$  represent random inputs obtained by adding isotropic Gaussian noise to the input  $\mathbf{x}$  and its perturbed version  $\mathbf{x} + \delta$ , respectively. Cohen et al. [12] applied the standard Neyman-Pearson lemma [33] to the above two random variables, and obtained the following two lemmas:

**Lemma 1** (Neyman-Pearson lemma for Gaussian with different means). *Let  $\mathbf{X} \sim \mathcal{N}(\mathbf{x}, \sigma^2 I)$ ,  $\mathbf{Y} \sim \mathcal{N}(\mathbf{x} + \delta, \sigma^2 I)$ , and  $F : \mathbb{R}^d \rightarrow \{0, 1\}$  be a random or deterministic function. Then, we have the following:*

(1) *If  $W = \{\mathbf{w} \in \mathbb{R}^d : \delta^T \mathbf{w} \leq \beta\}$  for some  $\beta$  and  $\Pr(F(\mathbf{X}) = 1) \geq \Pr(\mathbf{X} \in W)$ , then  $\Pr(F(\mathbf{Y}) = 1) \geq \Pr(\mathbf{Y} \in W)$ .*

(2) *If  $W = \{\mathbf{w} \in \mathbb{R}^d : \delta^T \mathbf{w} \geq \beta\}$  for some  $\beta$  and  $\Pr(F(\mathbf{X}) = 1) \leq \Pr(\mathbf{X} \in W)$ , then  $\Pr(F(\mathbf{Y}) = 1) \leq \Pr(\mathbf{Y} \in W)$ .*

**Lemma 2.** *Given an input  $\mathbf{x}$ , a real number  $q \in [0, 1]$ , as well as regions  $\mathcal{A}$  and  $\mathcal{B}$  defined as follows:*

$$\mathcal{A} = \{\mathbf{w} : \delta^T (\mathbf{w} - \mathbf{x}) \leq \sigma \|\delta\|_2 \Phi^{-1}(q)\}, \quad (13)$$

$$\mathcal{B} = \{\mathbf{w} : \delta^T (\mathbf{w} - \mathbf{x}) \geq \sigma \|\delta\|_2 \Phi^{-1}(1 - q)\}, \quad (14)$$

*we have the following:*

$$\Pr(\mathbf{X} \in \mathcal{A}) = q, \quad (15)$$

$$\Pr(\mathbf{X} \in \mathcal{B}) = q, \quad (16)$$

$$\Pr(\mathbf{Y} \in \mathcal{A}) = \Phi(\Phi^{-1}(q) - \frac{\|\delta\|_2}{\sigma}), \quad (17)$$

$$\Pr(\mathbf{Y} \in \mathcal{B}) = \Phi(\Phi^{-1}(q) + \frac{\|\delta\|_2}{\sigma}). \quad (18)$$

*Proof.* Please refer to [12]. □

Next, we first generalize the Neyman-Pearson lemma to the case of multiple functions and then derive the lemmas that will be used in our proof.

**Lemma 3.** *Let  $\mathbf{X}, \mathbf{Y}$  be two random variables whose probability densities are respectively  $\Pr(\mathbf{X} = \mathbf{w})$  and  $\Pr(\mathbf{Y} = \mathbf{w})$ , where  $\mathbf{w} \in \mathbb{R}^d$ . Let  $F_1, F_2, \dots, F_t : \mathbb{R}^d \rightarrow \{0, 1\}$  be  $t$  random or deterministic functions. Let  $k'$  be an integer such that:*

$$\sum_{i=1}^t F_i(1|\mathbf{w}) \leq k', \forall \mathbf{w} \in \mathbb{R}^d, \quad (19)$$

*where  $F_i(1|\mathbf{w})$  denotes the probability that  $F_i(\mathbf{w}) = 1$ . Then, we have the following:*

(1) *If  $W = \{\mathbf{w} \in \mathbb{R}^d : \Pr(\mathbf{Y} = \mathbf{w})/\Pr(\mathbf{X} = \mathbf{w}) \leq \mu\}$  for some  $\mu > 0$  and  $\frac{\sum_{i=1}^t \Pr(F_i(\mathbf{X})=1)}{k'} \geq \Pr(\mathbf{X} \in W)$ , then  $\frac{\sum_{i=1}^t \Pr(F_i(\mathbf{Y})=1)}{k'} \geq \Pr(\mathbf{Y} \in W)$ .*

(2) *If  $W = \{\mathbf{w} \in \mathbb{R}^d : \Pr(\mathbf{Y} = \mathbf{w})/\Pr(\mathbf{X} = \mathbf{w}) \geq \mu\}$  for some  $\mu > 0$  and  $\frac{\sum_{i=1}^t \Pr(F_i(\mathbf{X})=1)}{k'} \leq \Pr(\mathbf{X} \in W)$ , then  $\frac{\sum_{i=1}^t \Pr(F_i(\mathbf{Y})=1)}{k'} \leq \Pr(\mathbf{Y} \in W)$ .*

*Proof.* We first prove part (1). For convenience, we denote the complement of  $W$  as  $W^c$ . Then, we have the following:

$$\frac{\sum_{i=1}^t \Pr(F_i(\mathbf{Y}) = 1)}{k'} - \Pr(\mathbf{Y} \in W) \quad (20)$$

$$= \int_{\mathbb{R}^d} \frac{\sum_{i=1}^t F_i(1|\mathbf{w})}{k'} \cdot \Pr(\mathbf{Y} = \mathbf{w}) d\mathbf{w} - \int_W \Pr(\mathbf{Y} = \mathbf{w}) d\mathbf{w} \quad (21)$$

$$= \int_{W^c} \frac{\sum_{i=1}^t F_i(1|\mathbf{w})}{k'} \cdot \Pr(\mathbf{Y} = \mathbf{w}) d\mathbf{w} + \int_W \frac{\sum_{i=1}^t F_i(1|\mathbf{w})}{k'} \cdot \Pr(\mathbf{Y} = \mathbf{w}) d\mathbf{w} - \int_W \Pr(\mathbf{Y} = \mathbf{w}) d\mathbf{w} \quad (22)$$

$$= \int_{W^c} \frac{\sum_{i=1}^t F_i(1|\mathbf{w})}{k'} \cdot \Pr(\mathbf{Y} = \mathbf{w}) d\mathbf{w} - \int_W (1 - \frac{\sum_{i=1}^t F_i(1|\mathbf{w})}{k'}) \cdot \Pr(\mathbf{Y} = \mathbf{w}) d\mathbf{w} \quad (23)$$

$$\geq \mu \cdot [\int_{W^c} \frac{\sum_{i=1}^t F_i(1|\mathbf{w})}{k'} \cdot \Pr(\mathbf{X} = \mathbf{w}) d\mathbf{w} - \int_W (1 - \frac{\sum_{i=1}^t F_i(1|\mathbf{w})}{k'}) \cdot \Pr(\mathbf{X} = \mathbf{w}) d\mathbf{w}] \quad (24)$$

$$= \mu \cdot [\int_{W^c} \frac{\sum_{i=1}^t F_i(1|\mathbf{w})}{k'} \cdot \Pr(\mathbf{X} = \mathbf{w}) d\mathbf{w} + \int_W \frac{\sum_{i=1}^t F_i(1|\mathbf{w})}{k'} \cdot \Pr(\mathbf{X} = \mathbf{w}) d\mathbf{w} - \int_W \Pr(\mathbf{X} = \mathbf{w}) d\mathbf{w}] \quad (25)$$

$$= \mu \cdot [\int_{\mathbb{R}^d} \frac{\sum_{i=1}^t F_i(1|\mathbf{w})}{k'} \cdot \Pr(\mathbf{X} = \mathbf{w}) d\mathbf{w} - \int_W \Pr(\mathbf{X} = \mathbf{w}) d\mathbf{w}] \quad (26)$$

$$= \mu \cdot [\frac{\sum_{i=1}^t \Pr(F_i(\mathbf{X}) = 1)}{k'} - \Pr(\mathbf{X} \in W)] \quad (27)$$

$$\geq 0. \quad (28)$$

We have Equation 24 from 23 due to the fact that  $\Pr(\mathbf{Y} = \mathbf{w})/\Pr(\mathbf{X} = \mathbf{w}) \leq \mu, \forall \mathbf{w} \in W$ ,  $\Pr(\mathbf{Y} = \mathbf{w})/\Pr(\mathbf{X} = \mathbf{w}) > \mu, \forall \mathbf{w} \in W^c$ , and  $1 - \frac{\sum_{i=1}^t F_i(1|\mathbf{w})}{k'} \geq 0$ . Similarly, we can prove the part (2). We omit the details for conciseness reason.  $\square$

We apply the above lemma to random variables  $\mathbf{X}$  and  $\mathbf{Y}$ , and obtain the following lemma:

**Lemma 4.** *Let  $\mathbf{X} \sim \mathcal{N}(\mathbf{x}, \sigma^2 I)$ ,  $\mathbf{Y} \sim \mathcal{N}(\mathbf{x} + \delta, \sigma^2 I)$ ,  $F_1, F_2, \dots, F_t : \mathbb{R}^d \rightarrow \{0, 1\}$  be  $t$  random or deterministic functions, and  $k'$  be an integer such that:*

$$\sum_{i=1}^t F_i(1|\mathbf{w}) \leq k', \forall \mathbf{w} \in \mathbb{R}^d, \quad (29)$$

where  $F_i(1|\mathbf{w})$  denote the probability that  $F_i(\mathbf{w}) = 1$ . Then, we have the following:

(1) *If  $W = \{\mathbf{w} \in \mathbb{R}^d : \delta^T \mathbf{w} \leq \beta\}$  for some  $\beta$  and  $\frac{\sum_{i=1}^t \Pr(F_i(\mathbf{X})=1)}{k'} \geq \Pr(\mathbf{X} \in W)$ , then  $\frac{\sum_{i=1}^t \Pr(F_i(\mathbf{Y})=1)}{k'} \geq \Pr(\mathbf{Y} \in W)$ .*

(2) *If  $W = \{\mathbf{w} \in \mathbb{R}^d : \delta^T \mathbf{w} \geq \beta\}$  for some  $\beta$  and  $\frac{\sum_{i=1}^t \Pr(F_i(\mathbf{X})=1)}{k'} \leq \Pr(\mathbf{X} \in W)$ , then  $\frac{\sum_{i=1}^t \Pr(F_i(\mathbf{Y})=1)}{k'} \leq \Pr(\mathbf{Y} \in W)$ .*

By leveraging Lemma 2, Lemma 3, and Lemma 4, we derive the following lemma:

**Lemma 5.** *Suppose we have an arbitrary base multi-label classifier  $f$ , an integer  $k'$ , an input  $\mathbf{x}$ , an arbitrary set denoted as  $O$ , two label probability bounds  $\underline{p}_O$  and  $\bar{p}_O$  that satisfy  $\underline{p}_O \leq p_O = \sum_{i \in O} \Pr(i \in f_{k'}(\mathbf{X})) \leq \bar{p}_O$ , as well as regions  $\mathcal{A}_O$  and  $\mathcal{B}_O$  defined as follows:*

$$\mathcal{A}_O = \{\mathbf{w} : \delta^T (\mathbf{w} - \mathbf{x}) \leq \sigma \|\delta\|_2 \Phi^{-1}(\frac{\underline{p}_O}{k'})\} \quad (30)$$

$$\mathcal{B}_O = \{\mathbf{w} : \delta^T (\mathbf{w} - \mathbf{x}) \geq \sigma \|\delta\|_2 \Phi^{-1}(1 - \frac{\bar{p}_O}{k'})\} \quad (31)$$

Then, we have:

$$\Pr(\mathbf{X} \in \mathcal{A}_O) \leq \frac{\sum_{i \in O} \Pr(i \in f_{k'}(\mathbf{X}))}{k'} \leq \Pr(\mathbf{X} \in \mathcal{B}_O) \quad (32)$$

$$\Pr(\mathbf{Y} \in \mathcal{A}_O) \leq \frac{\sum_{i \in O} \Pr(i \in f_{k'}(\mathbf{Y}))}{k'} \leq \Pr(\mathbf{Y} \in \mathcal{B}_O) \quad (33)$$

*Proof.* We know  $\Pr(\mathbf{X} \in \mathcal{A}_O) = \frac{p_O}{k'}$  based on Lemma 2. Moreover, based on the condition  $\underline{p}_O \leq \sum_{i \in O} \Pr(i \in f_{k'}(\mathbf{X}))$ , we obtain the first inequality in Equation 32. Similarly, we can obtain the second inequality in Equation 32. We define  $F_i(\mathbf{w}) = \mathbb{I}(i \in f_{k'}(\mathbf{w}))$ ,  $\forall i \in O$ , where  $\mathbb{I}$  is indicator function. Then, we have  $\Pr(\mathbf{X} \in \mathcal{A}_O) \leq \frac{\sum_{i \in O} \Pr(i \in f_{k'}(\mathbf{X}))}{k'} = \frac{\sum_{i \in O} \Pr(F_i(\mathbf{X})=1)}{k'}$ . Note that there are  $k'$  elements in  $f_{k'}(\mathbf{w})$ ,  $\forall \mathbf{w} \in \mathbb{R}^d$ , therefore, we have  $\sum_{i \in O} F_i(1|\mathbf{w}) = \sum_{i \in O} \mathbb{I}(i \in f_{k'}(\mathbf{w})) \leq k'$ ,  $\forall \mathbf{w} \in \mathbb{R}^d$ . Then, we can apply Lemma 4 and we have the following:

$$\Pr(\mathbf{Y} \in \mathcal{A}_O) \leq \frac{\sum_{i \in O} \Pr(F_i(\mathbf{Y}) = 1)}{k'} = \frac{\sum_{i \in O} \Pr(i \in f_{k'}(\mathbf{Y}))}{k'}, \quad (34)$$

which is the first inequality in Equation 33. Similarly, we can obtain the second inequality in Equation 33.  $\square$

Based on Lemma 1 and Lemma 2, we derive the following lemma:

**Lemma 6.** *Suppose we have an arbitrary base multi-label classifier  $f$ , an integer  $k'$ , an input  $\mathbf{x}$ , an arbitrary label which is denoted as  $l$ , two label probability bounds  $\underline{p}_l$  and  $\bar{p}_l$  that satisfy  $\underline{p}_l \leq p_l = \Pr(l \in f_{k'}(\mathbf{X})) \leq \bar{p}_l$ , and regions  $\mathcal{A}_l$  and  $\mathcal{B}_l$  defined as follows:*

$$\mathcal{A}_l = \{\mathbf{w} : \delta^T(\mathbf{w} - \mathbf{x}) \leq \sigma \|\delta\|_2 \Phi^{-1}(\underline{p}_l)\} \quad (35)$$

$$\mathcal{B}_l = \{\mathbf{w} : \delta^T(\mathbf{w} - \mathbf{x}) \geq \sigma \|\delta\|_2 \Phi^{-1}(1 - \bar{p}_l)\} \quad (36)$$

Then, we have:

$$\Pr(\mathbf{X} \in \mathcal{A}_l) \leq \Pr(l \in f_{k'}(\mathbf{X})) \leq \Pr(\mathbf{X} \in \mathcal{B}_l) \quad (37)$$

$$\Pr(\mathbf{Y} \in \mathcal{A}_l) \leq \Pr(l \in f_{k'}(\mathbf{Y})) \leq \Pr(\mathbf{Y} \in \mathcal{B}_l) \quad (38)$$

*Proof.* We know  $\Pr(\mathbf{X} \in \mathcal{A}_l) = \underline{p}_l$  based on Lemma 2. Moreover, based on the condition  $\underline{p}_l \leq \Pr(l \in f_{k'}(\mathbf{X}))$ , we obtain the first inequality in Equation 37. Similarly, we can obtain the second inequality in Equation 37. We define  $F(\mathbf{w}) = \mathbb{I}(l \in f_{k'}(\mathbf{w}))$ . Based on the first inequality in Equation 37, we know  $\Pr(\mathbf{X} \in \mathcal{A}_l) \leq \Pr(l \in f_{k'}(\mathbf{X})) = \Pr(F(\mathbf{X}) = 1)$ . Then, we apply Lemma 1 and we have the following:

$$\Pr(\mathbf{Y} \in \mathcal{A}_l) \leq \Pr(F(\mathbf{Y}) = 1) = \Pr(l \in f_{k'}(\mathbf{Y})), \quad (39)$$

which is the first inequality in Equation 38. The second inequality in Equation 38 can be obtained similarly.  $\square$

Next, we formally show our proof for Theorem 1.

*Proof.* We leverage the law of contraposition to prove our theorem. Roughly speaking, if we have a statement:  $P \rightarrow Q$ , then, it's contrapositive is:  $\neg Q \rightarrow \neg P$ , where  $\neg$  denotes negation. The law of contraposition claims that a statement is true if, and only if, its contrapositive is true. We define the predicate  $P$  as follows:

$$\begin{aligned} & \max\left\{\Phi\left(\Phi^{-1}(\underline{p}_{a_e}) - \frac{R}{\sigma}\right), \max_{u=1}^{d-e+1} \frac{k'}{u} \cdot \Phi\left(\Phi^{-1}\left(\frac{p_{\Gamma_u}}{k'}\right) - \frac{R}{\sigma}\right)\right\} \\ & > \min\left\{\Phi\left(\Phi^{-1}(\bar{p}_{b_s}) + \frac{R}{\sigma}\right), \max_{v=1}^{k-e+1} \frac{k'}{v} \cdot \Phi\left(\Phi^{-1}\left(\frac{\bar{p}_{\Lambda_v}}{k'}\right) + \frac{R}{\sigma}\right)\right\}. \end{aligned} \quad (40)$$

We define the predicate  $Q$  as follows:

$$\min_{\delta, \|\delta\|_2 \leq R} |L(\mathbf{x}) \cap g_k(\mathbf{x} + \delta)| \geq e. \quad (41)$$

We will first prove the statement:  $P \rightarrow Q$ . To prove it, we consider its contrapositive, i.e., we prove the following statement:  $\neg Q \rightarrow \neg P$ .

**Deriving necessary condition:** Suppose  $\neg Q$  is true, i.e.,  $\min_{\delta, \|\delta\|_2 \leq R} |L(\mathbf{x}) \cap g_k(\mathbf{x} + \delta)| < e$ . On the one hand, this means there exist at least  $d - e + 1$  elements in  $L(\mathbf{x})$  do not appear in  $g_k(\mathbf{x} + \delta)$ . For convenience, we use  $\mathcal{U}_r \subseteq L(\mathbf{x})$  to denote those elements, a subset of  $L(\mathbf{x})$  with  $r$  elements where  $r = d - e + 1$ . On the other hand, there exist at least  $k - e + 1$  elements in  $\{1, 2, \dots, c\} \setminus L(\mathbf{x})$  appear

in  $g_k(\mathbf{x} + \delta)$ . We use  $\mathcal{V}_s \subseteq \{1, 2, \dots, c\} \setminus L(\mathbf{x})$  to denote them, a subset of  $\{1, 2, \dots, c\} \setminus L(\mathbf{x})$  with  $s = k - e + 1$  elements. Formally, we have the following:

$$\exists \mathcal{U}_r \subseteq L(\mathbf{x}), \mathcal{U}_r \cap g_k(\mathbf{x} + \delta) = \emptyset \quad (42)$$

$$\exists \mathcal{V}_s \subseteq \{1, 2, \dots, c\} \setminus L(\mathbf{x}), \mathcal{V}_s \subseteq g_k(\mathbf{x} + \delta), \quad (43)$$

In other words, there exist sets  $\mathcal{U}_r$  and  $\mathcal{V}_s$  such that the adversarially perturbed label probability  $p_i^*$ 's for elements in  $\mathcal{V}_s$  are no smaller than these for the elements in  $\mathcal{U}_r$ . Formally, we have the following necessary condition if  $|L(\mathbf{x}) \cap g_k(\mathbf{x} + \delta)| < e$ :

$$\min_{\mathcal{U}_r} \max_{i \in \mathcal{U}_r} \Pr(i \in f_{k'}(\mathbf{Y})) \leq \max_{\mathcal{V}_s} \min_{j \in \mathcal{V}_s} \Pr(j \in f_{k'}(\mathbf{Y})) \quad (44)$$

**Bounding  $\max_{i \in \mathcal{U}_r} \Pr(i \in f_{k'}(\mathbf{Y}))$  and  $\min_{j \in \mathcal{V}_s} \Pr(j \in f_{k'}(\mathbf{Y}))$  for given  $\mathcal{U}_r$  and  $\mathcal{V}_s$ :** For simplicity, we assume  $\mathcal{U}_r = \{w_1, w_2, \dots, w_r\}$ . Without loss of generality, we assume  $p_{w_1} \geq p_{w_2} \geq \dots \geq p_{w_r}$ . Similarly, we assume  $\mathcal{V}_s = \{z_1, z_2, \dots, z_s\}$  and  $\bar{p}_{z_s} \geq \dots \geq \bar{p}_{z_2} \geq \bar{p}_{z_1}$ . For an arbitrary element  $i \in \mathcal{U}_r$ , we define the following region:

$$\mathcal{A}_i = \{\mathbf{w} : \delta^T(\mathbf{w} - \mathbf{x}) \leq \sigma \|\delta\|_2 \Phi^{-1}(p_i)\} \quad (45)$$

Then, we have the following for any  $i \in \mathcal{U}_r$ :

$$\Pr(i \in f_{k'}(\mathbf{Y})) \geq \Pr(\mathbf{Y} \in \mathcal{A}_i) = \Phi(\Phi^{-1}(p_i) - \frac{\|\delta\|_2}{\sigma}) \quad (46)$$

We obtain the first inequality from Lemma 6, and the second equality from Lemma 2. Similarly, for an arbitrary element  $j \in \mathcal{V}_s$ , we define the following region:

$$\mathcal{B}_j = \{\mathbf{w} : \delta^T(\mathbf{w} - \mathbf{x}) \geq \sigma \|\delta\|_2 \Phi^{-1}(1 - \bar{p}_j)\} \quad (47)$$

Then, based on Lemma 6 and Lemma 2, we have the following:

$$\Pr(j \in f_{k'}(\mathbf{Y})) \leq \Pr(\mathbf{Y} \in \mathcal{B}_j) = \Phi(\Phi^{-1}(\bar{p}_j) + \frac{\|\delta\|_2}{\sigma}) \quad (48)$$

Therefore, we have the following:

$$\max_{i \in \mathcal{U}_r} \Pr(i \in f_{k'}(\mathbf{Y})) \quad (49)$$

$$\geq \max_{i \in \mathcal{U}_r} \Phi(\Phi^{-1}(p_i) - \frac{\|\delta\|_2}{\sigma}) = \max_{i \in \{w_1, w_2, \dots, w_r\}} \Phi(\Phi^{-1}(p_i) - \frac{\|\delta\|_2}{\sigma}) = \Phi(\Phi^{-1}(p_{w_1}) - \frac{\|\delta\|_2}{\sigma}) \quad (50)$$

$$\min_{j \in \mathcal{V}_s} \Pr(j \in f_{k'}(\mathbf{Y})) \quad (51)$$

$$\leq \min_{j \in \mathcal{V}_s} \Phi(\Phi^{-1}(\bar{p}_j) + \frac{\|\delta\|_2}{\sigma}) = \min_{j \in \{z_1, z_2, \dots, z_s\}} \Phi(\Phi^{-1}(\bar{p}_j) + \frac{\|\delta\|_2}{\sigma}) = \Phi(\Phi^{-1}(\bar{p}_{z_1}) + \frac{\|\delta\|_2}{\sigma}) \quad (52)$$

Next, we consider all possible subsets of  $\mathcal{U}_r$  and  $\mathcal{V}_s$ . We denote  $\Gamma_u \subseteq \mathcal{U}_r$ , a subset of  $u$  elements in  $\mathcal{U}_r$ , and denote  $\Lambda_v \subseteq \mathcal{V}_s$ , a subset of  $v$  elements in  $\mathcal{V}_s$ . Then, we have the following:

$$\max_{i \in \mathcal{U}_r} \Pr(i \in f_{k'}(\mathbf{Y})) \geq \max_{\Gamma_u \subseteq \mathcal{U}_r} \max_{i \in \Gamma_u} \Pr(i \in f_{k'}(\mathbf{Y})) \quad (53)$$

$$\min_{j \in \mathcal{V}_s} \Pr(j \in f_{k'}(\mathbf{Y})) \leq \min_{\Lambda_v \subseteq \mathcal{V}_s} \min_{j \in \Lambda_v} \Pr(j \in f_{k'}(\mathbf{Y})) \quad (54)$$

We define the following quantities:

$$\underline{p}_{\Gamma_u} = \sum_{i \in \Gamma_u} p_i \text{ and } \bar{p}_{\Lambda_v} = \sum_{j \in \Lambda_v} \bar{p}_j \quad (55)$$

Given these quantities, we define the following region based on Equation 30:

$$\mathcal{A}_{\Gamma_u} = \{\mathbf{w} : \delta^T(\mathbf{w} - \mathbf{x}) \leq \sigma \|\delta\|_2 \Phi^{-1}(\frac{\underline{p}_{\Gamma_u}}{k'})\} \quad (56)$$

$$\mathcal{B}_{\Lambda_v} = \{\mathbf{w} : \delta^T(\mathbf{w} - \mathbf{x}) \geq \sigma \|\delta\|_2 \Phi^{-1}(1 - \frac{\bar{p}_{\Lambda_v}}{k'})\} \quad (57)$$

Then, we have the following:

$$\frac{\sum_{i \in \Gamma_u} \Pr(i \in f_{k'}(\mathbf{Y}))}{k'} \quad (58)$$

$$\geq \Pr(\mathbf{Y} \in \mathcal{A}_{\Gamma_u}) \quad (59)$$

$$= \Phi\left(\Phi^{-1}\left(\frac{p_{\Gamma_u}}{k'}\right) - \frac{\|\delta\|_2}{\sigma}\right) \quad (60)$$

We have Equation 59 from 58 based on Lemma 5, and we have Equation 60 from 59 based on Lemma 2. Therefore, we have the following:

$$\max_{i \in \Gamma_u} \Pr(i \in f_{k'}(\mathbf{Y})) \quad (61)$$

$$\geq \frac{\sum_{i \in \Gamma_u} \Pr(i \in f_{k'}(\mathbf{Y}))}{u} \quad (62)$$

$$= \frac{k'}{u} \cdot \Phi\left(\Phi^{-1}\left(\frac{p_{\Gamma_u}}{k'}\right) - \frac{\|\delta\|_2}{\sigma}\right) \quad (63)$$

We have Equation 62 from 61 because the maximum value is no smaller than the average value. Similarly, we have the following:

$$\min_{j \in \Lambda_v} \Pr(j \in f_{k'}(\mathbf{Y})) \leq \frac{k'}{v} \cdot \Phi\left(\Phi^{-1}\left(\frac{\bar{p}_{\Lambda_v}}{k'}\right) + \frac{\|\delta\|_2}{\sigma}\right) \quad (64)$$

Recall that we have  $\bar{p}_{w_1} \geq \bar{p}_{w_2} \geq \dots \geq \bar{p}_{w_r}$  for  $\mathcal{U}_r$ . By taking all possible  $\Gamma_u$  with  $u$  elements into consideration, we have the following:

$$\max_{i \in \mathcal{U}_r} \Pr(i \in f_{k'}(\mathbf{Y})) \geq \max_{\Gamma_u \subseteq \mathcal{U}_r} \max_{i \in \Gamma_u} \Pr(i \in f_{k'}(\mathbf{Y})) \geq \max_{\Gamma_u = \{w_1, \dots, w_u\}} \frac{k'}{u} \cdot \Phi\left(\Phi^{-1}\left(\frac{p_{\Gamma_u}}{k'}\right) - \frac{\|\delta\|_2}{\sigma}\right) \quad (65)$$

In other words, we only need to consider  $\Gamma_u = \{w_1, \dots, w_u\}$ , i.e., a subset of  $u$  elements in  $\mathcal{U}_r$  whose label probability upper bounds are the largest, where ties are broken uniformly at random. The reason is that  $\Phi\left(\Phi^{-1}\left(\frac{p_{\Gamma_u}}{k'}\right) - \frac{\|\delta\|_2}{\sigma}\right)$  increases as  $p_{\Gamma_u}$  increases. Combining with Equations 49, we have the following:

$$\max_{i \in \mathcal{U}_r} \Pr(i \in f_{k'}(\mathbf{Y})) \geq \max\left\{\Phi\left(\Phi^{-1}(p_{w_1}) - \frac{\|\delta\|_2}{\sigma}\right), \max_{\Gamma_u = \{w_1, \dots, w_u\}} \frac{k'}{u} \cdot \Phi\left(\Phi^{-1}\left(\frac{p_{\Gamma_u}}{k'}\right) - \frac{\|\delta\|_2}{\sigma}\right)\right\} \quad (66)$$

Similarly, we have the following:

$$\min_{j \in \mathcal{V}_s} \Pr(j \in f_{k'}(\mathbf{Y})) \leq \min\left\{\Phi\left(\Phi^{-1}(\bar{p}_{z_1}) + \frac{\|\delta\|_2}{\sigma}\right), \min_{\Lambda_v = \{z_1, \dots, z_v\}} \frac{k'}{v} \cdot \Phi\left(\Phi^{-1}\left(\frac{\bar{p}_{\Lambda_v}}{k'}\right) + \frac{\|\delta\|_2}{\sigma}\right)\right\} \quad (67)$$

**Bounding  $\min_{\mathcal{U}_r} \max_{i \in \mathcal{U}_r} \Pr(i \in f_{k'}(\mathbf{Y}))$  and  $\max_{\mathcal{V}_s} \min_{j \in \mathcal{V}_s} \Pr(j \in f_{k'}(\mathbf{Y}))$ :** We have the following:

$$\min_{\mathcal{U}_r} \max_{i \in \mathcal{U}_r} \Pr(i \in f_{k'}(\mathbf{Y})) \quad (68)$$

$$\geq \min_{\mathcal{U}_r} \max\left\{\max_{i \in \{w_1, w_2, \dots, w_r\}} \Phi\left(\Phi^{-1}(p_i) - \frac{\|\delta\|_2}{\sigma}\right), \max_{\Gamma_u = \{w_1, \dots, w_u\}} \frac{k'}{u} \cdot \Phi\left(\Phi^{-1}\left(\frac{p_{\Gamma_u}}{k'}\right) - \frac{\|\delta\|_2}{\sigma}\right)\right\} \quad (69)$$

$$\geq \max\left\{\max_{i \in \{a_e, a_{e+1}, \dots, a_k\}} \Phi\left(\Phi^{-1}(p_i) - \frac{\|\delta\|_2}{\sigma}\right), \max_{\Gamma_u = \{a_e, \dots, a_{e+u-1}\}} \frac{k'}{u} \cdot \Phi\left(\Phi^{-1}\left(\frac{p_{\Gamma_u}}{k'}\right) - \frac{\|\delta\|_2}{\sigma}\right)\right\} \quad (70)$$

$$= \max\left\{\Phi\left(\Phi^{-1}(p_{a_e}) - \frac{\|\delta\|_2}{\sigma}\right), \max_{\Gamma_u = \{a_e, \dots, a_{e+u-1}\}} \frac{k'}{u} \cdot \Phi\left(\Phi^{-1}\left(\frac{p_{\Gamma_u}}{k'}\right) - \frac{\|\delta\|_2}{\sigma}\right)\right\} \quad (71)$$

$$= \max\left\{\Phi\left(\Phi^{-1}(p_{a_e}) - \frac{\|\delta\|_2}{\sigma}\right), \max_{u=1}^{d-e+1} \frac{k'}{u} \cdot \Phi\left(\Phi^{-1}\left(\frac{p_{\Gamma_u}}{k'}\right) - \frac{\|\delta\|_2}{\sigma}\right)\right\}, \quad (72)$$

---

**Algorithm 1:** Computing the Certified Intersection Size
 

---

**Input:**  $f, \mathbf{x}, L(\mathbf{x}), R, k', k, n, \sigma$ , and  $\alpha$ .

**Output:** Certified intersection size.

$\mathbf{x}^1, \mathbf{x}^2, \dots, \mathbf{x}^n \leftarrow \text{RANDOMSAMPLE}(\mathbf{x}, \sigma)$

$\text{counts}[i] \leftarrow \sum_{t=1}^n \mathbb{I}(i \in f(\mathbf{x}^t)), i = 1, 2, \dots, c.$

$p_i, \bar{p}_j \leftarrow \text{PROBBOUNDSESTIMATION}(\text{counts}, \alpha), i \in L(\mathbf{x}), j \in \{1, 2, \dots, c\} \setminus L(\mathbf{x})$

$e \leftarrow \text{BINARYSEARCH}(\sigma, k', k, R, \{p_i | i \in L(\mathbf{x})\}, \{\bar{p}_j | j \in \{1, 2, \dots, c\} \setminus L(\mathbf{x})\})$

**return**  $e$

---

where  $\Gamma_u = \{a_e, \dots, a_{e+u-1}\}$ . We have Equation 70 from 69 because  $\max\{\max_{i \in \{w_1, w_2, \dots, w_r\}} \Phi(\Phi^{-1}(p_i) - \frac{\|\delta\|_2}{\sigma}), \max_{u=\{w_1, \dots, w_u\}} \frac{k'}{u} \cdot \Phi(\Phi^{-1}(\frac{p_{\Gamma_u}}{k'}) - \frac{\|\delta\|_2}{\sigma})\}$  reaches the minimal value when  $\mathcal{U}_r$  contains  $r$  elements with smallest label probability lower bounds, i.e.,  $\mathcal{U}_r = \{a_e, a_{e+1}, \dots, a_d\}$ , where  $r = d - e + 1$ . Similarly, we have the following:

$$\max_{\mathcal{V}_s} \min_{j \in \mathcal{V}_s} \Pr(j \in f_{k'}(\mathbf{Y})) \leq \min\{\Phi(\Phi^{-1}(\underline{p}_{b_s}) + \frac{\|\delta\|_2}{\sigma}), \min_{v=1}^s \frac{k'}{v} \cdot \Phi(\Phi^{-1}(\frac{\bar{p}_{\Lambda_v}}{k'}) + \frac{\|\delta\|_2}{\sigma})\}, \quad (73)$$

where  $\Lambda_v = \{b_{s-v+1}, \dots, b_s\}$  and  $s = k - e + 1$ .

**Applying the law of contraposition:** Based on necessary condition in Equation 44, if we have  $|T \cap g_k(\mathbf{x} + \delta)| < e$ , then, we must have the following:

$$\max\{\Phi(\Phi^{-1}(\underline{p}_{a_e}) - \frac{\|\delta\|_2}{\sigma}), \max_{u=1}^{d-e+1} \frac{k'}{u} \cdot \Phi(\Phi^{-1}(\frac{p_{\Gamma_u}}{k'}) - \frac{\|\delta\|_2}{\sigma})\} \quad (74)$$

$$\leq \min_{\mathcal{U}_r} \max_{i \in \mathcal{U}_r} \Pr(i \in f_{k'}(\mathbf{Y})) \quad (75)$$

$$\leq \max_{\mathcal{V}_s} \min_{j \in \mathcal{V}_s} \Pr(j \in f_{k'}(\mathbf{Y})) \quad (76)$$

$$\leq \min\{\Phi(\Phi^{-1}(\bar{p}_{b_e}) + \frac{\|\delta\|_2}{\sigma}), \min_{v=1}^{k-e+1} \frac{k'}{v} \cdot \Phi(\Phi^{-1}(\frac{\bar{p}_{\Lambda_v}}{k'}) + \frac{\|\delta\|_2}{\sigma})\}, \quad (77)$$

We apply the law of contraposition and we obtain the statement: if we have the following:

$$\begin{aligned} & \max\{\Phi(\Phi^{-1}(\underline{p}_{a_e}) - \frac{\|\delta\|_2}{\sigma}), \max_{u=1}^{d-e+1} \frac{k'}{u} \cdot \Phi(\Phi^{-1}(\frac{p_{\Gamma_u}}{k'}) - \frac{\|\delta\|_2}{\sigma})\} \\ & > \min\{\Phi(\Phi^{-1}(\bar{p}_{b_s}) + \frac{\|\delta\|_2}{\sigma}), \max_{v=1}^{k-e+1} \frac{k'}{v} \cdot \Phi(\Phi^{-1}(\frac{\bar{p}_{\Lambda_v}}{k'}) + \frac{\|\delta\|_2}{\sigma})\}, \end{aligned} \quad (78)$$

Then, we must have  $|L(\mathbf{x}) \cap g_k(\mathbf{x} + \delta)| \geq e$ . From Equation 8, we know that Equation 78 is satisfied for  $\forall \|\delta\|_2 \leq R$ . Therefore, we reach our conclusion.  $\square$

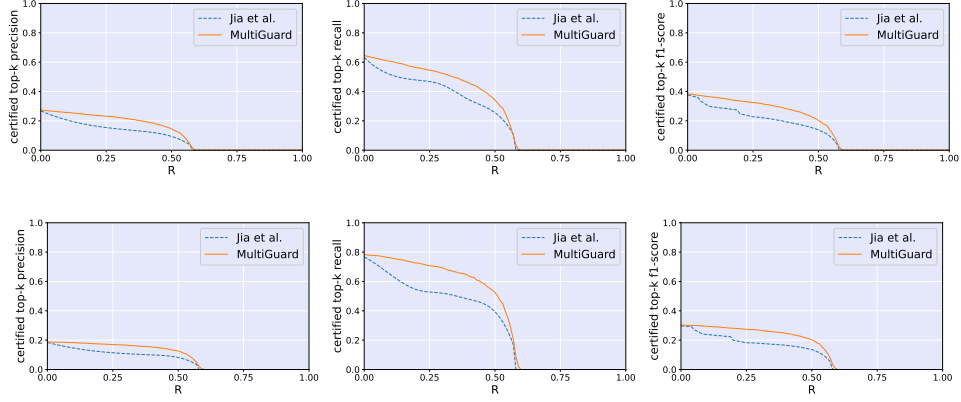

(a) Certified top- $k$  precision@ $R$  (b) Certified top- $k$  recall@ $R$  (c) Certified top- $k$  f1-score@ $R$

**Figure 2: Comparing MultiGuard with with Jia et al. [22] on MS-COCO (first row) and NUS-WIDE (second row) dataset.**

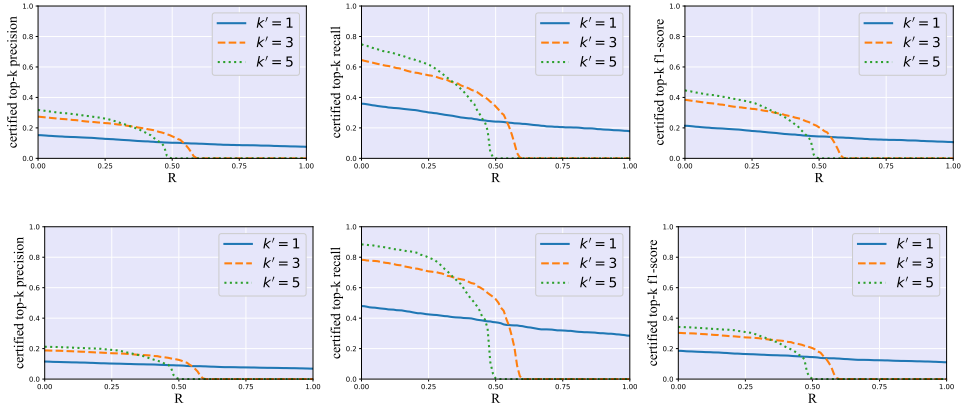

(a) Certified top- $k$  precision@ $R$  (b) Certified top- $k$  recall@ $R$  (c) Certified top- $k$  f1-score@ $R$

**Figure 3: Impact of  $k'$  on the certified top- $k$  precision@ $R$ , certified top- $k$  recall@ $R$ , and certified top- $k$  f1-score@ $R$  on MS-COCO (first row) and NUS-WIDE (second row) dataset.**

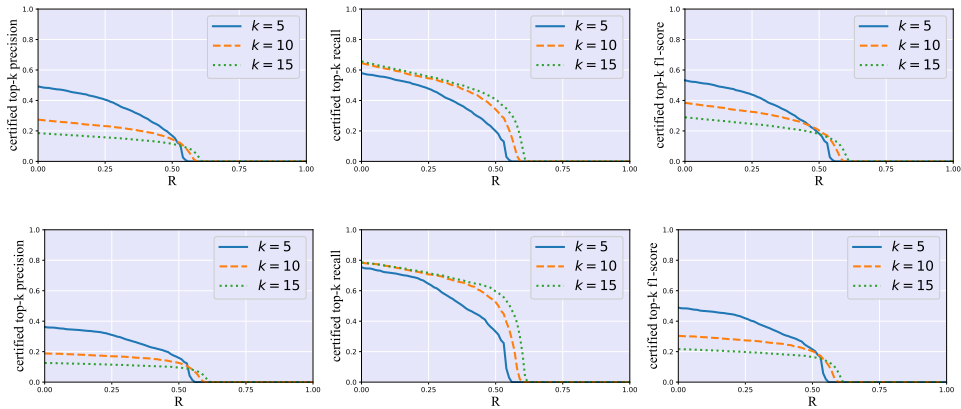

(a) Certified top- $k$  precision@ $R$  (b) Certified top- $k$  recall@ $R$  (c) Certified top- $k$  f1-score@ $R$

**Figure 4: Impact of  $k$  on the certified top- $k$  precision@ $R$ , certified top- $k$  recall@ $R$ , and certified top- $k$  f1-score@ $R$  on MS-COCO (first row) and NUS-WIDE (second row) dataset.**

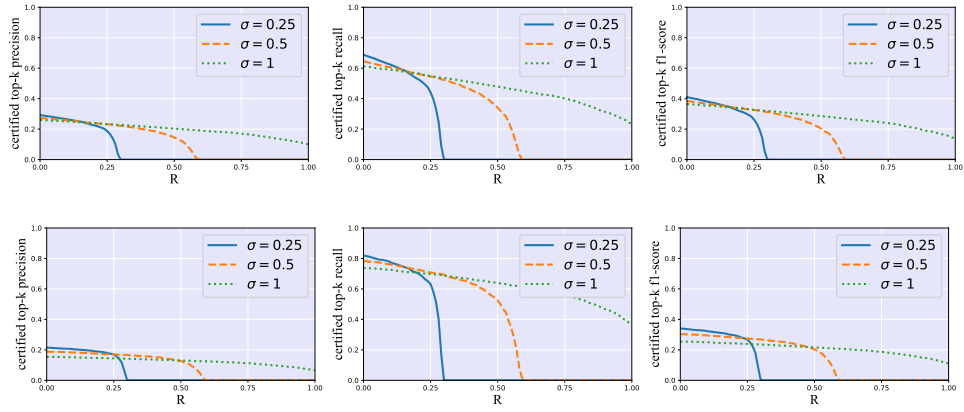

(a) Certified top- $k$  precision@ $R$  (b) Certified top- $k$  recall@ $R$  (c) Certified top- $k$  f1-score@ $R$

**Figure 5: Impact of  $\sigma$  on the certified top- $k$  precision@ $R$ , certified top- $k$  recall@ $R$ , and certified top- $k$  f1-score@ $R$  on MS-COCO (first row) and NUS-WIDE (second row) dataset.**

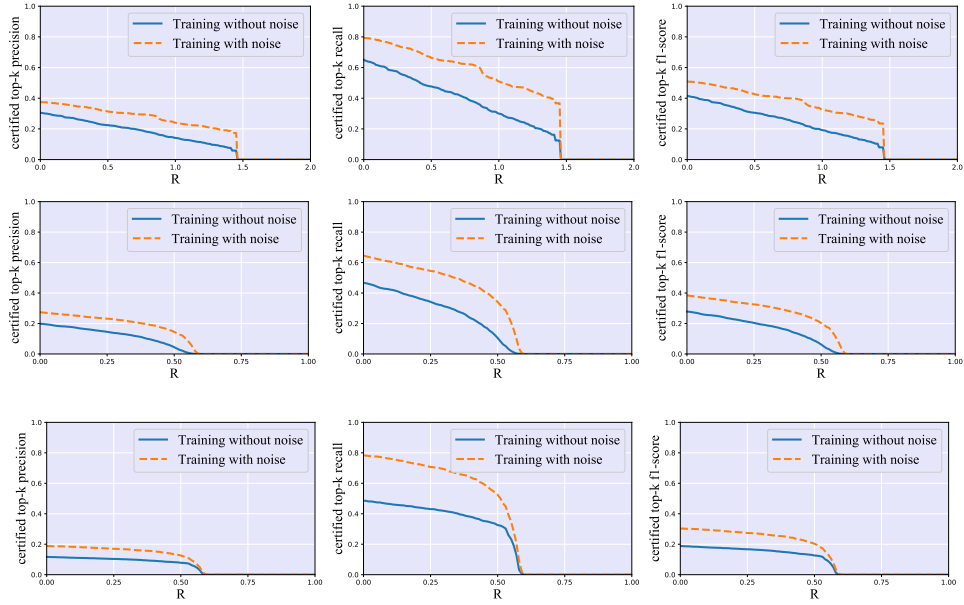

(a) Certified top- $k$  precision@ $R$  (b) Certified top- $k$  recall@ $R$  (c) Certified top- $k$  f1-score@ $R$

**Figure 6: Training the base multi-label classifier with vs. without noise on Pascal VOC (first row), MS-COCO (second row) and NUS-WIDE (third row) datasets.**
